# Supplementary material for: Shot-gun proteome and transcriptome mapping of the jujube floral organ and identification of a pollen-specific S-locus F-box gene
Source: PeerJ journal article supplement (doi:10.7717/peerj.3588), 2017-07-17
Supplement: Supplementary_Table_1__Statistics_of_clean_reads_after_quality_control_and_the_data_mapped_to_genome_of.pdf [file Supplementary_Table_1__Statistics_of_clean_reads_after_quality_control_and_the_data_mapped_to_genome_of.pdf]

**Supplementary Table 1** Statistics of clean reads after quality control and the data mapped to genome of 'Junzao'

|                         | <b>Sample1</b>      | <b>Sample2*</b>     |
|-------------------------|---------------------|---------------------|
| Total reads             | 52,842,742          | 59,415,908          |
| Total mapped reads      | 47,596,470 (90.07%) | 54,791,182 (92.22%) |
| Multiple mapped reads   | 1,065,791 (2.02%)   | 1,157,336 (1.95%)   |
| Uniquely mapped reads   | 46,530,679 (88.06%) | 53,633,846 (90.27%) |
| Read-1                  | 23,541,145 (44.55%) | 26,953,918 (45.36%) |
| Read-2                  | 22,989,534 (43.51%) | 26,679,928 (44.9%)  |
| Reads map to '+' strand | 23,247,507 (43.99%) | 26,820,210 (45.14%) |
| Reads map to '-' strand | 23,283,172 (44.06%) | 26,813,636 (45.13%) |
| Non-splice reads        | 34,872,623 (65.99%) | 39,232,311 (66.03%) |
| Splice reads            | 11,658,056 (22.06%) | 14,401,535 (24.24%) |

Total reads: total number of filtered clean reads;

Total mapped reads refer to all of those reads mapped to reference genome;

Multiple mapped reads refer to those reads mapped to >1 site, Uniquely mapped reads refer to those reads only mapped to one site;

Splice reads: reads mapped to >1 exons.
