# Supplementary material for: Shot-gun proteome and transcriptome mapping of the jujube floral organ and identification of a pollen-specific S-locus F-box gene
Source: PeerJ. 2017 Jul 17;5:e3588. doi: 10.7717/peerj.3588 (PMC5516771; doi:10.7717/peerj.3588)
Supplement: Table S2 [file peerj-05-3588-s003.xlsx]

## Sheet: qRT
Supplementary Table 2 q-RT-PCR result of those selected genes
Gend ID	2-ΔCt	RPKM	iBAQ	Primer-forward	Primer-reverse	SWISSPROT	CDS_seq
Zj.jz005867001	4.23951e-06	0	-	TCCATTCTCCGATAGCCACT	GAGGGTGCTGAGGGTGTAAG	SWISSPROT:-	ATGACTGGAGAGCGTTTTTATCATCCAGGCCATGACCATAGTTTGAGGTTGGTTTTTGGAACTAATACTGGTATAGAGTATGCTGATATAGACTATGCTGATCAGGAGCGCGATAAAAAATGCCATGGATGTGGTAGATGCATTCCATTCTCCGATAGCCACTATTATTGCCCAGAAAATGGTTGCGAGTATTACTTAGACCGTTCATGTTTCATGTTAGGATATCATTCCGAGATAAACCACCCCTTACACCCTCAGCACCCTCTGATTCCCTACTTTAAGAGTTTTCCTTATAATGATCAAGCACAGTTTATATGCAGCTTCTGTACAAAAGCCATAACATCAGGATTTCTACTCCACTGTACTCACTGTGATTTCTACCTTGATAGGGCTTGCTCG…
Zj.jz039687053	6.03716e-05	0.00887883	-	CAATTGGTTTGGCCAGTCTT	GCAGCCTTCCACTTTAGCAG	SWISSPROT:TMV resistance protein N OS=Nicotiana glutinosa GN=N PE=1 SV=1	ATGAAACAGCTTCGACTACTTATATTTAATTACAATAGTATAAAAAACTTGAAAGTTATGAACTTTAGTCACTGTCAATTTCTAAGAGAAATTCCTGACCTGTCAACAGTCCCAAATCTTGGGAGTTTACATCTTGACCATTGTAAAAGTCTAGTTGAGATTCATGAGTCTGTTGGCTCTCTTACTAAGCTGGTTGTATTGGACCTTCAATACTGCAGCAAGCTCAAGATTTTCCCAAGTAAATTGGAATTGAAAGTTTTGAAATTAAGTTACTCGAAATTCTTAAGAAAATTTCCTGACCTATCAACGGCGCCCAATGTTGAGAGCTTATATGTTGATAATTGTACAAGTTTAGTTGAGATTAATGAGTCCGTTGGATTTCTTAATAAGTTGGTTACA…
Zj.jz044313037	4.15994e-05	0.0129274	-	CATTCCCTTTGGCTCTGGTA	ACAGGCTCATTCTTCGGTGT	SWISSPROT:Cytochrome P450 82C4 OS=Arabidopsis thaliana GN=CYP82C4 PE=2 SV=1	ATGGAAATATCTTCTATTCAAGCGATATTTGGAACTTTCATTGCCTTTCTTCTTCTCCACAAAGCGTGGAAAAACATTCTCAAACACCATCACAACAACAAGAACAAAGGTAAGAAACTGCCAGAGCCACCAGGTGCATGGCCTTTAATCGGTCACCTTAACCTTCTCCGGGAACGAACTCCGGTTTACCGAATACTAGGAGGCATCGCCGACAACCACGGACCGATCTTCTCTATCCGGCTAGGCACGAAAAGGACCATGGTGGTGAGTAGCTGGGAAACAATAAAGGAATGCATTAGTACAAACGACCAAGCTTTCCTCACTCGTCCAGCTTCGGCCGCTTCAAAATACATGGGTTATGGAAATGCTCTTTTAGGCTTAACCACAAACCTACAATAC…
Zj.jz019381058	0.0222147	5.07	188300	CTGGAAGCTTTGGATTGGAA	AGGCAATCCTGGCTCCTTAT	SWISSPROT:Kinesin-like protein KIF15 OS=Strongylocentrotus purpuratus GN=KIF15 PE=1 SV=1	ATGCCGTTCATTTCAGAAGCAGCGAGCGCAATCAAGAGCAGATTTGGATTCCACAACCACCCCAACGACTCCGTTCCACAGGTCCGAAGCACTCCGGATTTGCTCAAATCCGCGTCCAGAGAGAATCTCGCTCAGTCTTCGATTGTTCGGAACATACGCGACTGGGATGACGATGACGATGGCAGAGCAGTTGCTAATACGGAGCCGTCGTCGACGACTTCATCTCAGAGCTTCGAGTTTCGCGAGGACCCCTCGTTCTGGAAGGATCACAATGTGCAGGTGATAATTAGGATTCGTCCTCTTAGTAGTAGTGAAATATCTTTGCAAGGCTACGGCAAATGTGTTCGTCAAGAGAGCTGCCAGGCAGTTACTTGGACGGGACATCCAGAGTCTCGTTTT…
Zj.jz028947018	0.0307825	8.9	174320	CTCATCGCCTCAGAAATCGT	TCCGCCAGAAGTAGCAGTAGA	SWISSPROT:Probable leucine-rich repeat receptor-like protein kinase At1g68400 OS=Arabidopsis thaliana GN=At1g68400 PE=2 SV=1	ATGGCGAACACCACCCATTTCATCGGACGTTTAGTTTTCTCTCTCATTATCCTCCATTTATCTGTTCTTGAAGCTTCTTTGAACTCCGATTTGGAAGCTCTAATGGCGTTCAAAGCAAACTCTGACACAACAAACAAGCTCATCAACTGGAACTCGACCTCCCACCCATGCACATTTACTGGGGTCTCCTGTATCCGCAACAGGGTATCACGTCTCGTTCTCGAGAATCTCGGTCTCCGAGGCTCCTTCGAACCACTCACCGCTCTAACCCAGCTCCGGGTTCTGAGCCTCAAGAAAAACCGTCTCTCGGGTCCCATTCCCGATCTGTCTAACGTCACGACCTTGAAACTGCTGTTCCTATCCTACAACGATTTCTCCGGCGCGTTTCCGGCGTCTGTA…
Zj.jz039969012	0.0214321	9.69	134180	TTGTTGCCTGATGATGGTTC	GAATGTCTTTGCCCGCTTT	SWISSPROT:Kinesin-3 OS=Arabidopsis thaliana GN=ATK3 PE=2 SV=1	ATGGTTGGTACGGCTACAAATGGAAGAAGGCAGCATGCTTTTTCGCAGGTTAATGGGGCACACGATATAGGTCCGAATAGTGCTCCGGCGAGTAATGCTGGTTCGGAATGCGGTGGCTTTGAGTTCACTAGAGAAGATGTTGAAGCATTGCTGAACGAGAAACCCAAAAGGAAGGACAGGTTCAATCTCAAGGAAAAATGTGATCTTTTAACGGAGTATATTAAAAGGCTTAAACTTTGCATCAAATGGTTTCAAGAGCTTGAGTCAAGCTACTTATTTGAGCAAGAGAAGTTGCAGGATAGGTTGATTGAGGCGGAGCAGAACTGTAGTAGAATAGAAATACTACTGGAAAAAAAAGAAGAGGAATTGAATGCCGTTATTGCGGAGCTCAGGAATAAT…
Zj.jz034305070	0.0530628	11.79	201540	AGCGTGAGACTGGCACCTAT	TCGTGGAGGGCTAGAAGAGA	SWISSPROT:Putative uncharacterized protein At4g01020, chloroplastic OS=Arabidopsis thaliana GN=At4g01020 PE=4 SV=1	ATGGCAGGGTTTCTACTTTTGCTTTTCCCTGATGCCATGAGGAAAACTCACTCAACGACGACATATTGGCCGGCACAACCGCCTCGAGGAAACGACCACCGGAAGCTTCAGAATCCGATTCCCAATTACCGATCAAACCCAAAGAACAGCACCCCCAATTTGCCTCCGAATCATCATCTGGGACCCGCAGCTTTGTCCTCTCCGTTCGAACGCCCAAACTTCGTCGTCAACCTCGTCGTCGAGCACCGCGACGCACGGAGACCCGATGTCAACGCTCTGCTCCGCCAATGCAAGTCGAAGCCCGAGAGCTTCAGACTCTCTCACTCCGGCATGGCCGTCGGCACTCTCTACTTCCGGCAGTGGGTCGACGCGCTCGCAGCCGTGGTCTGGTTCTGGGAG…
Zj.jz042571098	0.324064	158.27	10413000000	GTGCTCTTGCTCGTTCTGG	TCACAGCCTTCTCCCTCTTC	SWISSPROT:40S ribosomal protein S14-3 OS=Arabidopsis thaliana GN=RPS14C PE=2 SV=2	ATGTCAAAGAAGAAGACCAGAGAACCAAAAGAAGAAAATATTACCCTTGGACCTGCTGTCAAAGATGGAGAACATGTTTTTGGGGTGGCTCACATTTTTGCGTCATTCAATGACACATTTATTCATGTGACTGATCTCTCAGGAAGAGAAACCATTGTCCGCATCACTGGTGGTATGAAGGTGAAAGCTGATAGAGATGAATCTTCCCCATATGCTGCCATGCTTGCAGCACAGGATGTTGCCCAGAGATGCAAGGAATTAGGTATAACTGCTCTTCATATTAAGCTCCGAGCTACTGGAGGAAACAAAACAAAGACTCCTGGTCCGGGTGCCCAGTCTGCATTGCGTGCTCTTGCTCGTTCTGGGATGAGAATTGGCCGTATTGAGGATGTTACTCCA…
Zj.jz001293035	0.463237	159.94	14925000000	TTGCTCGTAGAGGTGGTGTG	TTCCTCCTAGCGTGCTCAGT	SWISSPROT:Histone H4 OS=Glycine max PE=3 SV=1	ATGTCGGGCCGTGGAAAAGGAGGCAAGGGATTGGGAAAAGGTGGTGCGAAACGTCACCGTAAGGTCCTCCGGGATAACATTCAAGGAATTACGAAGCCTGCCATTCGTCGTCTTGCTCGTAGAGGTGGTGTGAAGCGTATAAGTGGTCTGATCTACGAGGAGACTCGTGGGGTTCTCAAGATCTTCCTTGAGAACGTGATTCGTGACGCTGTCACGTACACTGAGCACGCTAGGAGGAAGACGGTGACCGCCATGGATGTGGTTTATGCACTCAAGAGGCAGGGTAGGACTCTGTATGGATTTGGGGGTTAG
Zj.jz017079159	0.806113	482.04	12050000000	GCGGAGATTGAGAAGAGGAA	CGGTCTGAGAATGGCTGAA	SWISSPROT:40S ribosomal protein S27-2 OS=Arabidopsis thaliana GN=RPS27B PE=2 SV=2	ATGGTTCTCCAAAACGATATTGATCTGTTGAACCCTCCGGCGGAGATTGAGAAGAGGAAGCACAAACTCAAGCGCCTCGTGCAGTCCCCCAACTCCTTCTTCATGGATGTCAAATGCCAAGGGTGCTTCAATATAACTACTGTTTTCAGCCATTCTCAGACCGTGGTGGTATGTGGAAACTGCCAAACTGTTCTGTGCCAGCCTACGGGTGGACGGGCAAGACTCACCGAAGGCTGCTCTTTCAGGAGAAAGGGAGACTAA
Zj.jz043343283	1.14857	537.57	12982000000	CCCATTGTTGAGCCTGAGAT	TGGTGGTCATTTAGAGCCTTG	SWISSPROT:Fructose-bisphosphate aldolase, cytoplasmic isozyme OS=Cicer arietinum GN=ALDC PE=2 SV=1	ATGTCTGCCTACAAGGGAAAATACCATGATGAGCTCATTGCTAATGCTGCATACATTGGCACCCCTGGCAAGGGTATCCTTGCTGCTGATGAATCAACTGGAACAATTGGCAAGCGTCTTTCCAGCATCAATGTTGAGAACAACGAGCCAAACAGGCGTGCTCTTCGTGAGCTTCTCTTCACGACTCCCGGTGCTCTCCAATACCTGAGTGGAGTGATTCTCTTCGAGGAAACCCTCTATCAATCCACAGCTGCAGGTAAGCCTTTTGTTGATGTCTTGAAGGAAGGTGGAGTCCTCCCTGGCATTAAGGTTGACAAGGGTACCGTAGAGCTTGCCGGAACCAATGGTGAGACAACCACCCAGGGTCTGGATGGCCTAGCCCAGCGTTGCCAGAAGTAC…
Zj.jz031003075	3.07467	1441.68	10177000000	GAATCGGTAGGAGCGGAAAG	GCGAACTTGGAGCCGTAGAT	SWISSPROT:Peptidyl-prolyl cis-trans isomerase OS=Catharanthus roseus GN=PCKR1 PE=2 SV=1	ATGGCGCCACCAAACCCTAAGGTGTTCTTCGATTTGACGATCGGTGGCCAACCGGCCGGCCGTGTGGTCATGGAGCTTTTTGCTGACGTCACTCCAATCACCGCCGAGAATTTCCGTGCCCTCTGCACCGGAGAGAAAGGAATCGGTAGGAGCGGAAAGCCTCTGCACTACAAAGGATCCACCTTCCACCGTGTGATCCCCGGTTTCATGTGCCAGGGAGGGGACTTCACAGCTGGAAATGGCACCGGCGGCGAGTCGATCTACGGCTCCAAGTTCGCCGACGAGAACTTCATCAAGAAGCACACCGGTCCTGGTATCCTTTCCATGGCGAATGCCGGACCCGGAACCAACGGATCTCAGTTCTTCATCTGTACGGCCAAGACCGAGTGGCTTGATGGC…
Zj.jz044867032	4.52593	2073.36	4755200000	TGGAAGAGTCGCAAATAGCA	TGGAGGTGTGAAATGAGCAA	SWISSPROT:Putative 12-oxophytodienoate reductase 11 OS=Oryza sativa subsp. japonica GN=OPR11 PE=2 SV=1	ATGGTGATAATTATAAGAATTGTTTTGGCACCGTTGACTAGACAAAGATCATATGGCACCATCCCTCAGCCACATGCCGCAATATACTACTCACAGAGAGCAACCAACGGGGGTCTTCTAATTGCTGAAGCAACCGGAGTTTCTGATACTGCTCAAGGGTATCCGAATACGCCTGGTATATGGACAAAAGAGCATGTTGAAGCATGGAAACCAATTGTTAAAGCTGTTCATGATAAAGGGGGTGTCTTCTTCTGTCAGATTTGGCATGTTGGAAGAGTCGCAAATAGCAATGTTCAACCAAATGGCCAAGCTCCAATCTCTAGTACAGACACTCCATTAGCCCCGCTAGTACGAGCTAATGGCTTTGATGTTGCTCATTTCACACCTCCAAGGAGGCTT…
Zj.jz001627199	4.71449	3269.9	123130000	TTCTCTCTGCTCTCGTCGTC	CGTTTCTTCCACTTCCTCCT	SWISSPROT:Indole-3-acetic acid-induced protein ARG2 OS=Vigna radiata var. radiata GN=ARG2 PE=2 SV=1	ATGGCTCGCTCTTTCTCCAACGCTAAGCTTCTCTCTGCTCTCGTCGTCGATGGATTCTCTACCGCAATTAGCAGGCGAGGATACGCGGCGGCATCACAAGGAGTTGTTTCGAGCGTGGCAAGAGGAGGTGCAGGAGGAAGTGGAAGAAACGTTGTGAAGAAGTCTGGGGAAGAGATAGTGGGCTCCACCGAGAAGGTTTCATGGACCCCCGACCCAGTAACCGGTTACTACAGACCAGAGAACGGCGCTCAGGAAATCGATGTGGCTGAGCTCCGAGCTATGCTCTTGAAGAAGAATTAA
Zj.jz004541044	8.92577	10441.3	785140	GGCTGTGGTTGTGGCTCTA	TGATGGTTTCAGTGGTGGTC	SWISSPROT:Metallothionein-like protein 1 OS=Pisum sativum GN=MTA PE=3 SV=1	ATGTCTGGCTGTGGTTGTGGCTCTAGCTGCTCGTGTGGAAGTGGCTGCAAATGTGGTAGAAACCCTGACCTCGGTTACTCCGAGAAGACCACCACTGAAACCATCATTGTTGGGGTTGCACCAGTTAAGATAGACAATGATGGATCGGAGGTGAGCCATGGAACAGAGAACGAGGGGTGCGGCTGCGGCAGTAACTGCCAGTGCGACCCATGCACGTGCAAATGA
Zj.jz012057051	16.8237	11154.3	39107000	TTGCTGTGGAGGAAACTGTG	AAAGGTCTCTGTCGTGGTCTTC	SWISSPROT:Metallothionein-like protein type 2 OS=Malus domestica GN=MT1 PE=3 SV=1	ATGTCTTGCTGTGGAGGAAACTGTGGCTGTGGCACTGCTTGCAAGTGCGGCAGCGGCTGTGGAGGATGTAAGATGTACCCTGACTTGAGCTACTCAGAGAAGACCACGACAGAGACCTTTATCACCGGCGTAGCTCCCGAGAAGCCACACTTTGAGGGATCTGAGATGGAAGTGGGAGCGGAGAATGGAGGCTGCAAGTGCGGAGACAACTGCACCTGCAATCCATGCACTTGTAAATGA
Zj.jz021805014	0.0640446	17.8623	-	ACCGCCACTTGCTTCTCTAA	AAACTCGGTGAACCATCCAT	SWISSPROT:Agamous-like MADS-box protein AGL8 homolog OS=Solanum tuberosum PE=2 SV=1	ATGGGGAGGGGTAGGGTTCAGCTAAAGCGGATCGAGAACAAGATAAGCAGGCAAGTAACGTTCTCAAAGAGAAGGACTGGATTGCTGAAGAAAGCTCATGAGATCTCTGTACTTTGTGATGCAGAAGTAGCTTTGATTGTTTTCTCTTCCAAAGGAAAGCTCTTTGAGTATTCTACGGATTCATGCATGGAAAGGATTTTGGAACGATACGAGAGATACTCATATGTAGAGCAGCACTTTGTTGCTAATGGTTCCAACTCCCAGGGAAGCTGGACTCACGAATATCCGAAGCTGAAGGCTAGGATTGAAGTTTTACAGAGGAACCTAAGGAATTTTATGGGACAAGATCTAGATACCTTAAGCTTACGAGAGCTTCAAAATTTAGAGCAACAGCTCGAC…
Zj.jz019129042	0.577318	165.145	7597300	CTCTTCGGCTGTTGTAATCG	TGTTGTTGTTGGTGCTGTTG	SWISSPROT:Floral homeotic protein APETALA 2 OS=Arabidopsis thaliana GN=AP2 PE=1 SV=1	ATGTGGGATCTCAATGACTCTCCTGATCAGAGGAGAGACGAAGAATCCGAAGAAGGGTGTTCATCCCAGAAGACTTCAATAGATGGAGACGATGAGAAAGGAAAACGGGTCGGATCGGTTTCGAATTTGAGCTCTTCGGCTGTTGTAATCGAAGACGGATCGGACGAAGAAGAGGACGGAGGAAGAGTTGGAGGAGGCGGCAGAATCAAGAAGAGAGGAAGTAATAGCAACAACAGCACCAACAACAACAACAACAACAGCAGCAGCAGTGGCAAAATATTCGGGTTCTCCGTGACCCACGACGATTCCATGGATAGTGATCCGCCGCCCGTGACCCGGCAGTTTTTTCCGGTCGATGATTCAGAAATGGGCACCGCATCTGGTGGTGGTGGAGCGGTG…
Zj.jz042571015	1.35343	685.256	32721000	TTGCTGTGGAGGAAACTGTG	TGATGGTTTCAGTGGTGGTC	SWISSPROT:Floral homeotic protein AGAMOUS OS=Panax ginseng GN=AG2 PE=2 SV=1	ATGGCATACCAAAACAAATCCATGTCAGTCTCTCCTCAAAGAAAATTGGGTAGGGGAAAGATCGAGATTAAGCGGATCGAAAACACCACAAATCGGCAAGTCACTTTCTGCAAGAGACGTAATGGTTTGCTAAAGAAAGCCTATGAGCTCTCTGTTCTCTGTGATGCTGAAGTTGCTCTCATAGTCTTCTCTAGCAGAGGACGCCTTTATGAGTATGCCAACAACAGTGTCAAGTCAACAATTGAAAGATACAAAAAGGCATGTTCAGATTCTTCAAATACAGGATCCGTTTCTGAAGCTAATGCTCAGTTCTACCAGCAAGAAGCTGCCAAGCTTCGTTCACAAATTGGAAGTGTGCAAAAACAAAATAGGGAGATGCTGGGTGAATGTCTAAGCAGT…
Zj.jz035999017	0.276742	107.62	6811400	AATCATCAAGCACCGGAAAG	TTTCTTAAGCAGCCCATTGC	SWISSPROT:Agamous-like MADS-box protein AGL1 OS=Arabidopsis thaliana GN=AGL1 PE=1 SV=1	ATGATGGAGTTCCGTAATCATCAAGCACCGGAAAGCTCATCCCATAGAAAAATGGGAAGAGGGAAAATCGAAATTAAACGAATCGAAAACACTACGAATCGACAAGTTACATTCTGCAAGAGACGCAATGGGCTGCTTAAGAAAGCCTATGAATTGTCTGTGCTTTGTGATGCTGAAGTTGCCCTCATCGTCTTCTCTAGCCGCGGCCGCCTCTATGAGTATGCTAACAACAGTGTTAGAGCAACGATTGAAAGGTACAAGAAAGCCTGCTCGGATACATCTAACACTGGATCTATTACTGAAGCTAATACTCAGTTTTACCAACAGGAGGCCTCAAAACTAAGAAGACAGATCCGCGAAATTCAGAATCTTAATAGGCATATATTGGGTGAAGCTCTT…
Zj.jz012139043	0.286372	104.515	-	CCAAGGTTTCCCTCATCATC	GCATCCCACAATCTCTTTCC	SWISSPROT:Floral homeotic protein PMADS 2 OS=Petunia hybrida GN=PMADS2 PE=2 SV=1	ATGGGGAGGGGAAAGATTGAGATCAAGAGGATTGAGAACTCAACCAACAGACAGGTTACCTACACTAAGAGAAGGAATGGAATCATCAAGAAAGCTAAGGAAATCACTGTTCTATGTGATGCCAAGGTTTCCCTCATCATCTTTTCTAGCTCCGGAAAGATGCAGCAATACTGTAGCCCTTCCACTACGTTGGTTGATATCTTGGACAATTATCACAAGCAGTCCGGAAAGAGATTGTGGGATGCTAAACATGAGAACCTCAGGAATGAACTGGATAGGATCAAGAAAGAAAATGACAACATGCAAATCGAGCTCAGGCACCTGAACGGGGAGGATATAACATCTTTGAACCACAGAGAGCTGATGGCCATAGAGGATGCACTTGACAAAGGCCTCGCA…
Zj.jz022481163	0.00556268	1.97322	-	CCTGCAGCTTCCTTTCTGTT	TGTTACGCGAGCAGATTGAG	SWISSPROT:Agamous-like MADS-box protein AGL19 OS=Arabidopsis thaliana GN=AGL19 PE=1 SV=1	ATGAAGCGTATAGAAAATGCCGCGAGCAGGCAAGTAACTTTCTCAAAGAGAAGAAACGGACTGCTGAAGAAAGCTTTTGAGTTATCGGTTCTTTGTGATGCTGAAGTTGCACTTATAATTTTCTCTCCAAGAGGAAAGCTCTATGAGTTTTCAAGCTCTAGTATGAACAAGATAATTGAGCGCTATCAAAGAAGAGGAAAGGATTTAGGACTTAGCAACAAAGCAGATCCAGAAGATAAGCAGGTTGCGAAGGAAGACACCTTTAGCATGGCAAAGAGAATTGAGTTTCTTGAAGCCTCTAAACGGAAGCTAATGGGGGATGGTTTGGATTCATGTCCTATTGACGAGCTTCAACAAATAGAAAACCAATTGGAGCGAAGCTTAGGCAAAATCAGGGCA…
Zj.jz039715039	0.271832	86.3142	9827300	ATGCTGAGGTTGCCCTTATC	TGCTGTTGTCTTGAGGAGTGA	SWISSPROT:Agamous-like MADS-box protein AGL6 OS=Arabidopsis thaliana GN=AGL6 PE=1 SV=2	ATGGGAAGAGGAAGAGTAGAGCTGAAGAGGATAGAGAATAAGATAAACAGGCAGGTAACATTCTCAAAGAGAAGGAATGGTTTGCTAAAGAAAGCATATGAACTTTCTGTTCTATGTGATGCTGAGGTTGCCCTTATCATCTTCTCTAGTAGAGGCAAGCTTTATGAGTTTGGTAATGCTGGTATACCAAAAACCCTTGAGCGTTATCAACGTTGTTCCTTCACTCCTCAAGACAACAGCATTGAACGTGAAACACAGAGCTGGTACCAGGAGGTTACAAAATTAAAGGCAAAATATGAAGCCCTTCAACGCACACAGAGGTTGCACTTGCTTGGTGAAGATCTTGGACCACTTAGTGTAAAGGAGCTGCAGAATCTTGAAAAGCAGCTTGAAGGAGCT…
Zj.jz044881002	0.667546	273.428	64653000	AAGGAAGAAATGCTGCTGGA	GCTGGGTGGTATGTTAGACTTTG	SWISSPROT:MADS-box protein CMB1 OS=Dianthus caryophyllus GN=CMB1 PE=2 SV=1	ATGGGGAGAGGTAAGGTGGAGCTGAAGAGGATTGAGAACAAGATAAATCGACAAGTAACTTTTGCGAAAAGAAGGAATGGGTTGCTAAAGAAGGCCTATGAGCTCTCAGTTCTATGTGAATCTGAGGTTGCTCTTATCATCTTCTCCAACCGTGGCAAGCTCTATGAGTTCTGCAGCGGTCATAGCATGGCCAAGACCCTTGAAAGGTATGATAGATGCAGCTATGGAGCCCTTGAAGTGAAACAGCCTGCAAAAGATACCCAGAGCAACTACCAGGAATATTTGAAGCTAAAAGCAAAAGTCGAGCTCCTGCAAAGTACACAGAGAAACCTTCTTGGAGAGGATATTGAGCATATGGGAACAAAGGATCTTGAACAGCTTGAGCATCAAATGGATGCT…
Zj.jz011213011	0.0991627	41.9598	-	GGGAAGAGGGAGAGTGGAAC	AAGGCCAACTTCAGCATCAC	SWISSPROT:MADS-box protein CMB1 OS=Dianthus caryophyllus GN=CMB1 PE=2 SV=1	ATGGGAAGAGGGAGAGTGGAACTAAAGAGGATAGAGAATAAAATTAACAGGCAAGTGACATTTTCTAAGAGAAGAAATGGATTGCTCAAGAAAGCTTATGAGCTCTCAGTTCTCTGTGATGCTGAAGTTGGCCTTATTATTTTCTCTAACCGTGGAAAGCTCTATGAGTTCTGCAGCGGCTCCAGCATGGTGAAAACACTGGAAAGGTACCATAAATGCAGTTATGGAGCACTGGATGCCAGCCGACTTATCAATGATAATCAGAGCAGCTATCAGGAATACTTGAAGCTAAAAGCAAGAGCTGAGGTCCTGCAACGATCTCAGAGAAACCTTCTTGGGGAAGACCTGGGGCCTTTAAGTACAAAGGAACTTGAGCAGCTTGAACATCAATTAGAGACG…
Zj.jz021445339	0.806481	309.034	75902000	ATAACAGTGGCGGAAGCAGT	GAGAGAATCCCGAAGGAACC	SWISSPROT:Agamous-like MADS-box protein AGL9 homolog OS=Petunia hybrida GN=FBP2 PE=1 SV=2	ATGGGAAGAGGGAGAGTGGAGCTGAAGAGGATTGAGAACAAGATCAACAGGCAAGTGACTTTTGCAAAGAGAAGGAACGGGCTTTTGAAGAAAGCCTACGAGCTTTCCGTTCTTTGCGATGCCGAGGTCGCTCTTATCATCTTCTCCAATAGAGGAAAGCTGTACGAGTTTTGCAGTAGTTCAAGCATGCTCAAAACACTTGAGAGGTACCAGAAATGCAACTATGGAGCCCCAGAGACTAATGTGTCCGCAAGGGAGGCGTTGGAACTGAGTAGCCAGCAGGAATATCTGAAGCTTAAAGCACGTTATGAGGCTCTATACCGGAACCAAAGAAATCTTCTGGGGGAAGACCTTGGACCTTTAAACAGCAAAGAGCTCGAGTCACTTGAAAGGCAACTG…
Zj.jz026591005	9.34127e-06	0	-	ATAACAGTGGCGGAAGCAGT	GAGAGAATCCCGAAGGAACC	SWISSPROT:Protein UNUSUAL FLORAL ORGANS OS=Arabidopsis thaliana GN=UFO PE=1 SV=2	ATGGACACCAGGATATGGAGTAAACTTCCACAAAATCTGCTTGACCGTGTGATCGCGTTTCTTCCACCGCCGGCTTTTTTCAGAGCTCGTTGCGTCTGCAAGAGATGGTATGCTCTTCTTTTCTCCAACAGCTTTCTCGAGCTGTACCTTCAAGTAACACCTCGCCGCCATTGGTTCCTCTTCTTCAAGCACAAAAGCCTCAAGAGCTACATATACAGGAGGGATAACAGTGGCGGAAGCAGTGCAGGAGATGGTGGTGGTAGACAGGAAACAAGCTGTGAAGGGTACCTTTTCGACCCTAATGAGGTTGCATGGTATCGACTTTCCTTCTCTTTGGTTCCTTCGGGATTCTCTCCAGCTTCATCTTCAGGTGGTTTAATCTGCTGGGTTTCATATGAA…
Zj.jz001627113	0.00173614	0.977949	-	TCTGTGCCGTAATGTGGTTC	TTTGCCATCCTTGTAGACGA	SWISSPROT:Bidirectional sugar transporter NEC1 OS=Petunia hybrida GN=NEC1 PE=2 SV=1	ATGGCACATTTGGCTCCTCATCAATTGGCTTTTGTGTTTGGCATTCTTGGCAACATTGTGTCCTTCCTTGTCTACCTAGCACCAATACCAACATTTTATAGGATTTTCAAGAAAAAATCAACAGAAGGGTTTCAAGCTATTCCTTATTCAGTAGCATTGTTCAGTGCTATGCTCATGCTCTACTATGCTTTCCTTAAAAGAAATGCATTTATGCTCATCACCATTAATTCCATTGGGTGTGCAATTGAAACAATTTACCTTACAATGTACGTGATTTATGCATCGAGAAACACCAGGATTTATACAATAAAGCTGCTTTGCCTGTTCAACGTGGGAGCTTATGGTTTGATTCTACTTTCTACATCCTTTATTCCAAATCATTCTGAGCGGCTTGCGGCA…
Zj.jz034227050	7.24156	3143.18	93850000	TCCATTGGCTGTGCTATTGA	AACCATCATCAAGCCGTAGG	SWISSPROT:Bidirectional sugar transporter NEC1 OS=Petunia hybrida GN=NEC1 PE=2 SV=1	ATGGCCTTCTTCCTGACACCGCAGCAACTGGCTTTCATCTTTGGTCTCTTAGGTAACATCATATCTTTTATGGTGTTCTTGTCCCCAATCCCAACATTTTATACAATAATAAAGAAGAAAACATCAGAAGGGTTCCAATCAATTCCTTATGTAATATCACTTCTGAGTGCAATGTTGTTGTTGTATTATGGTGTCCTCAAGACTAATGCTTTGCTCATTGTCACCATCAATTCCATTGGCTGTGCTATTGAAGTTACTTACCTCGTCATCTACTTGATATATGCACCAAAGAAGGACAAGATGTTTACTTTGAGGTTGATACTGCTCTTCAATATGGTAGCCTACGGCTTGATGATGGTTGTCACTATCTTCCTTTTCAAAGGTTCTGGCCGCGTTAAT…
Zj.jz015029070	0.151229	57.2298	-	TCGCAGCACCACTAAGCAT	TACGCCATAACAGAGCCACA	SWISSPROT:Bidirectional sugar transporter SWEET12 OS=Arabidopsis thaliana GN=SWEET12 PE=2 SV=1	ATGGCTATCTTCGCAACTCATAATATTGGGGTCTTAATATTTGGTATTCTAGGCAATATCGTTTCCTTTGTGGTTTTCCTAGCACCGGTGCCAACATTTTTGAGGGTGATTAAGAAGAAATCAACAGAAGGTTTTCAATCGGTTCCCTATGTGGTGGCACTATTCAGTGGGATGATGTGGCTCTATTATGCATCCCTAAAGTCTGATGAGACCCTTCTCATCACTATCAACTCATTCGGTTGTGTCATTGAGACCATCTACATTGCCATTTATATCACCTATGCACCAAAACAAGCAAGGTTGTTCACCTTGAGGCTACTTCTCCTGTTCAATTTTGGGGGATTTTGCTTGGTTCTTCTTCTTTCCCACTTCTTAGCTGAAGGACCTACCCGAATCAAA…
