# Supplementary material for: Shot-gun proteome and transcriptome mapping of the jujube floral organ and identification of a pollen-specific S-locus F-box gene
Source: PeerJ. 2017 Jul 17;5:e3588. doi: 10.7717/peerj.3588 (PMC5516771; doi:10.7717/peerj.3588)
Supplement: Table S3 [file peerj-05-3588-s004.xlsx]

## Sheet: Table S2
Table S3 Primer sets for PCR amplication of the candiate S locus F-box genes
No.	Gene ID	CDs	Primer Forward (5'->3')	Primer Reverse (5'->3')	PCR products Length(bp)
1	Zj.jz027555001	ATGACGATGAATCATGAGTTTGGTGAATCATTATCATCTGAATCTTCATCATCAAGAAGTGAATCTTTTGTTAATGTATATGATCTGACAGAAGACTTGGCGGTAGAAATTCTGATGAGGTTGCCGGAGGTGGATGTGATAAAAATGAAGAGGGTGTGCAAGTCATTGTATTCCTTAATCAACAGCTCCGACTTCATCGCCAAATACTCCCTCCTCGACGGTGACAGGGATCCTCATATGTTCATATCCATCCCATTTAAAGGAACTCGCGTAGTTTCCGTGTCTTACGAAGATGAAGATGATGATGATGCAACAGTCAACAGAGTTTTCCACATCAGACCCACACCCACACGGCCTCAACCTCAAGCCCACCGCCTTTTCTGCTACTGTTGCTGTGAC…	GGAACTCGCGTAGTTTCCGT	GTGACAAAATCCATCGGCGT	489
2	Zj.jz027555002	ATGATGATGAATCATGAGTTTGGGGAATCATCATCATCATCTGAATCTTCTGTTAATGTATATGGTCTGACACAAGACTTGGTGATGGAAATTCTGTTGAGGTTGCCGGTGACAGATCTGATACGAATGAAGAGGGTGTGCAAGTCATTGTATTCCTTGATCAGCAGCTCCGACTTCATCGCCAGACACTCCCTCTTCGACGGTGATAGGGGTCCTTATATGTGCATGTCTATCCCATATGAAGGAACTAGGGTAGTTACTTACGATGATGATGACGATACAAGCACAACAGGACTCAGAAAAAAGGAGTTATCCACATCCGACCCACACCCATGCACCCTCAACCTCAAGCTGACCGCCTTTACTGCTACTGTTGTTGTGACGGTTCCGGCCTATGGT…	CCAGACACTCCCTCTTCGAC	GGCGTATACCATGTCACTGC	527
3	Zj.jz027555004	ATGACGATGAATCATGAGTTTGGGGAATCATTATCATCTGAATCTTCATCATCAAGAAGTGATTCTTTTGTTAATGTATATGATCTGACAGAAGACTTGGTCATAGAAATTCTGATGAGGTTGCCGGTGGTGGATGTGATAAAACTGAAGAGGGTGTGCAAGTCATTGTATTCCTTAATCAACATCTCCTACTTCATCGCCAAATACTCCCTCCTCGACGGTGACAGGGATCCTTATATGTTCATCTCCATCCCATTTAAAGGAACTCGCGTAGTTTCCGTTTCTTACGAAGATGATGATGATGATGCAACAGTCAAAACAGTTATCCACATCAGACCCACACCCACACGGTTCTGCTGCTGTTGCTGTGACGGTGTCCTACTTGTTTCGTTTTTCGGC…	TTTGCCACTGGCCAGGATTC	CTGCGGCAATGGGTAACAAG	519
4	Zj.jz035833029	ATGACGATGAATCATGAGTTTGGGGAATCATTATCATCTGAATCTTCATCATCAAGAAGTGAGTCTTTTGTTAATGTATATGATCTGACAGAAGACTTGGCGGTAGAAATTCTGATGAGGTTGCCGGTGGTGGATGTGATAAAAATGAAGAGGGTGTGCAAGTCATTGTATTCCTTAATCAATAGCTCCGACTTCATCGCCAAATACTCCCTCCTCGACGGTGACAGGGATCCTTATATGTTCATCTCCATCCCATTTAAAGGAACTCGTGTAGTTTCCGTTTACGAAGATGATGATGATGATGATGATGATGATGATGATGCAACAGTCAAAACAGTTATCCACATCAGACCCACACCCGCACGGTTCTGCTGCTGTTGCTGTGACGGTGTCCTACTT…	TGTCACTGGCCAGGATTCAG	TGCGGCAATTGGTAACAAGC	516
5	Zj.jz026591005	ATGGACACCAGGATATGGAGTAAACTTCCACAAAATCTGCTTGACCGTGTGATCGCGTTTCTTCCACCGCCGGCTTTTTTCAGAGCTCGTTGCGTCTGCAAGAGATGGTATGCTCTTCTTTTCTCCAACAGCTTTCTCGAGCTGTACCTTCAAGTAACACCTCGCCGCCATTGGTTCCTCTTCTTCAAGCACAAAAGCCTCAAGAGCTACATATACAGGAGGGATAACAGTGGCGGAAGCAGTGCAGGAGATGGTGGTGGTAGACAGGAAACAAGCTGTGAAGGGTACCTTTTCGACCCTAATGAGGTTGCATGGTATCGACTTTCCTTCTCTTTGGTTCCTTCGGGATTCTCTCCAGCTTCATCTTCAGGTGGTTTAATCTGCTGGGTTTCATATGAA…	AGCCTTATGGAGAGCAACGG	ATGGAAGCGTCAACGGATCA	406
6	Zj.jz039969034	ATGGATAAAGCTATTGATATGCCTATTCAGAGGAGAAAGTGTAAGCATATAGGGAGGACAAAGAGTAAGCATACTCGGAGGTCAAAGGGTAATTGGAATGAAGTACAATTTACGATAGACATTGTTACCAATATTCTCTCAAGGATTCCTGTTCAGGGTCTCTTACTTTTCAAGACTGTCTCTAAACTTTGGAATGGACTGATAAGCAGTTCAAACTTCAAGAAATTGCAGCTGACCTGGTCCAGAGATAATCCCATGTATATACTTTATCCTTATACTGATGCAAAACCAAAGATGTACGTGCTAGATGAATATGGGGACGTGGATGAGATGATCACTCTTCCAGGCTGTGAAAATGTTTCTGATCTAAGTATGATTTGTTCTTATGATGGTTTAGTA…	AACTAGCTGTCGGAGTTGCC	TCAGACTCATTGCTGTCCGT	451
7	Zj.jz039541036	ATGCTTTGTGATATTCCAGTGGAGGTCCTAGAAGAACATGTATTGTGGAGACTTTCGGTGAAAACGCTCGTCAAACTGGGATTTGTTTGCAAATCCTTGAATGCAATTGTCACGGCTCCTAGATTTATTTCCAAGCATGCCGATTGGTCAGCCAAAAACCAACCTGGTTATTTAATCAACCATGGAGGATGCGAAATAACACGTTTAGATAAGAGGTTTGATTTCATAGAGAAACTGGATTTTCCTTTCAAACACTTCAAATTCCAATTGGTTGGTGCATGTCATGGTTTGCTTTGCTTGACAAAAGAGTTCCGGCCGAAGAAGGAAGAGTTTCCCACAACATTTATATGGAATCCTTCCATTAGGCTAGTCAAGGAAATTCTACCTCCGGACATCATC…	GTTCCGGCCGAAGAAGGAAG	AGTGATCCAATGCACACGAC	495
